# Supplementary material for: Metal-directed one-dimensional chiral zigzag chains and right-handed 61 helix with multiple chiral components: luminescence and NLO properties
Source: Royal Society of Chemistry journal article supplement (doi:10.1039/c2ce25043h), 2012-01-01
Supplement: c2ce25043h.pdf [file c2ce25043h.pdf]

## ELECTRONIC SUPPLEMENTARY DATA

for

### **Metal-directed one-dimensional chiral zigzag chain and right-handed $6_1$ helix with multiple chiral components: Fluorescence and NLO properties**

Lin Cheng,<sup>†,‡</sup> Liming Zhang<sup>†</sup>, Shaohua Gou<sup>\*,†,‡</sup>, Qingna Cao,<sup>†</sup> Jianquan Wang<sup>†</sup> and Lei  
Fang<sup>†,‡</sup>

<sup>†</sup> *Pharmaceutical Research Center and School of Chemistry and Chemical Engineering, Southeast University, Nanjing 211189, P. R. China*

<sup>‡</sup> *Jiangsu Province Hi-Tech Key Laboratory for Bio-medical Research, Southeast University, Nanjing 211189, China.*

E-mail: [sgou@seu.edu.cn](mailto:sgou@seu.edu.cn)

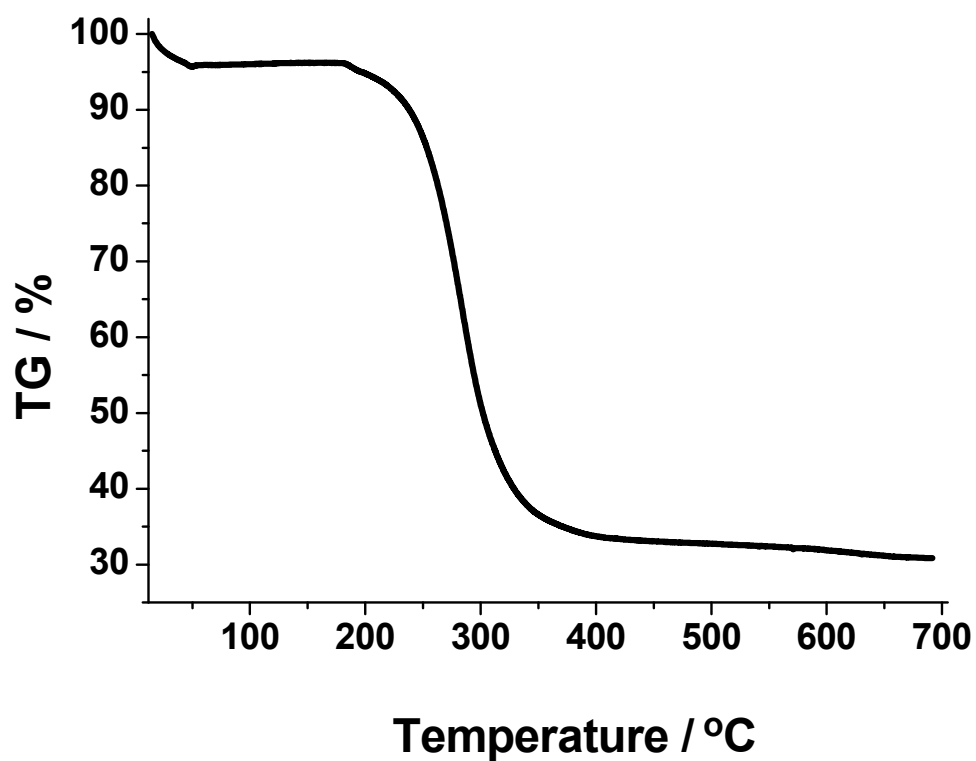

Fig S1. TG plot for 1.

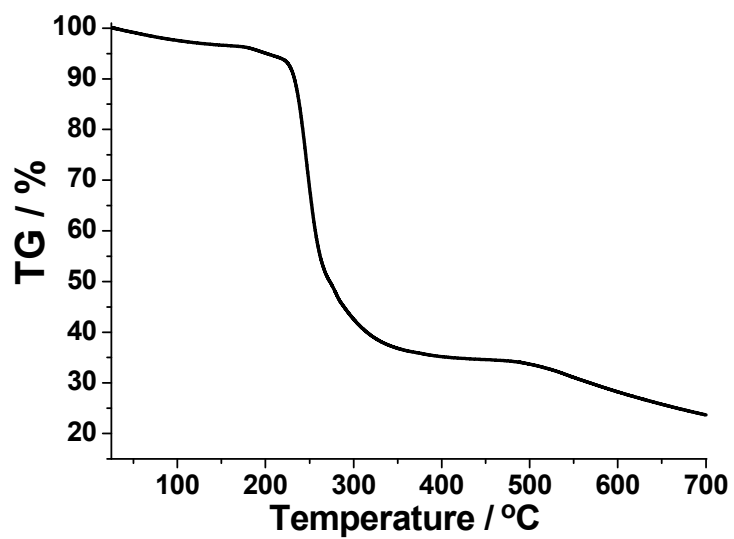

Fig S2. TG plot for 2.

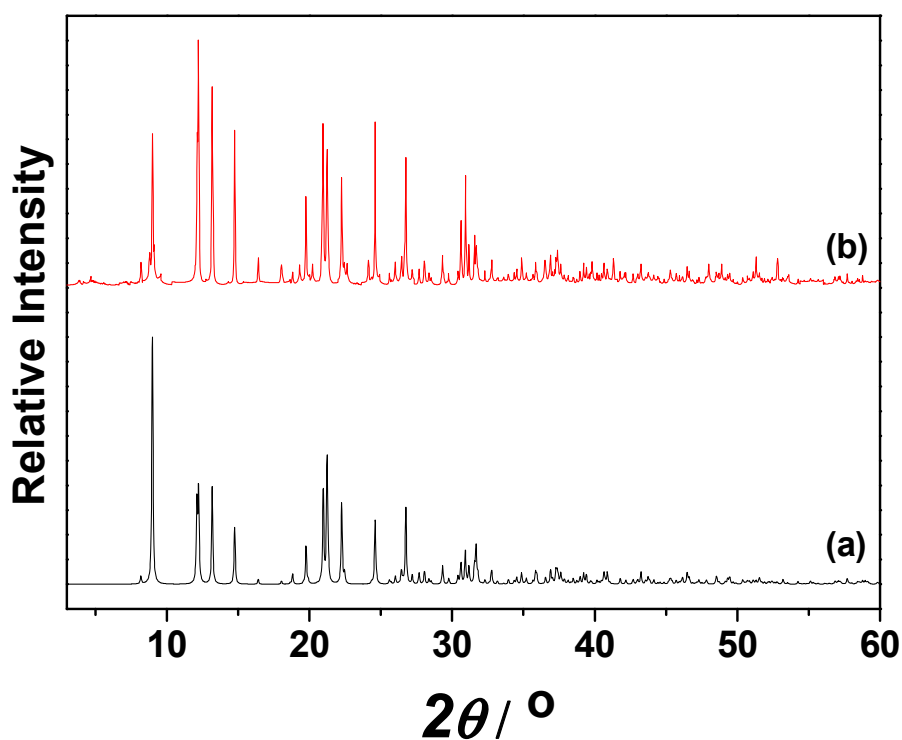

Fig S3. The XRD patterns of **1**, simulated from X-ray single crystal data (a) and polycrystalline as newly synthesized (b).

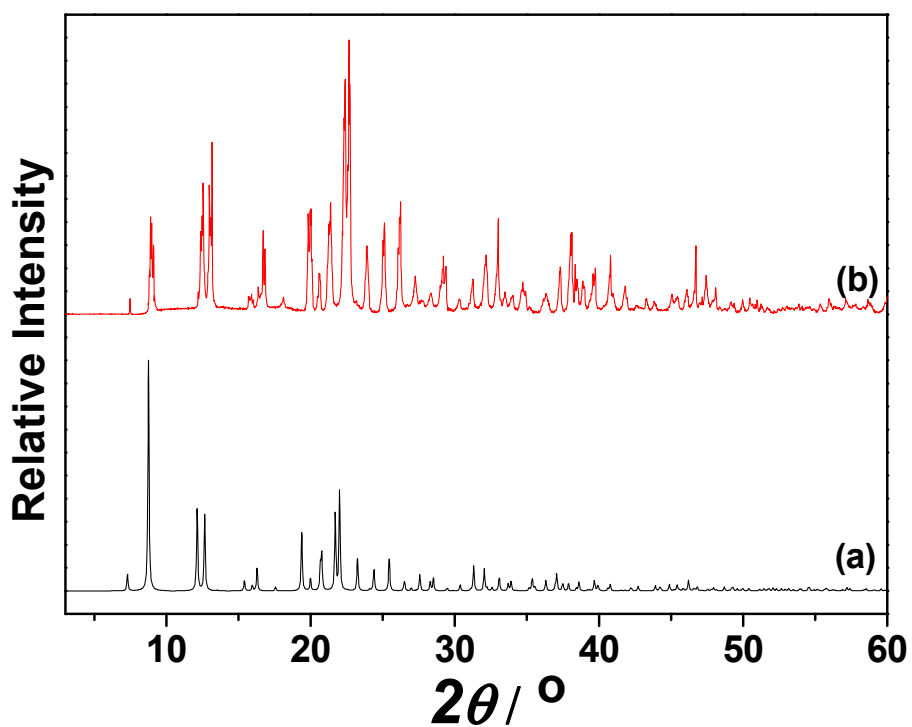

Fig S4. The XRD patterns of **2**, simulated from X-ray single crystal data (a) and polycrystalline as newly synthesized (b).
